# Supplementary material
Source: HighWire-hosted journal article supplement (https://jcptest-stage.highwire.org/content/jcp-2023-208771)
Supplement: inline-supplementary-material-2 [file inline-supplementary-material-2.pdf]

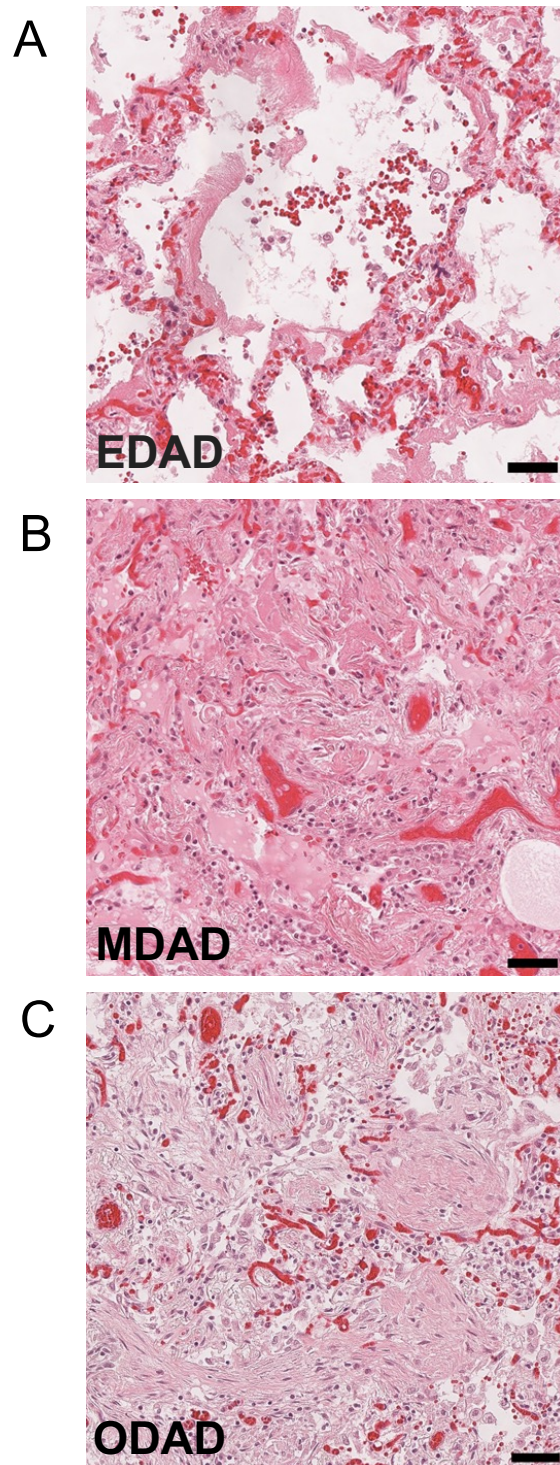

**Figure S1. Representative images showing DAD progression**

**A)** Exudative DAD (EDAD). **B)** mixed DAD (MDAD). **C)** organising DAD (ODAD).

Scale bar = 50µm
